# Supplementary material for: Clustered Regularly Interspaced Short Palindromic Repeat Analysis of Clonal Complex 17 Serotype III Group B Streptococcus Strains Causing Neonatal Invasive Diseases
Source: MDPI journal article supplement (doi:10.3390/ijms222111626), 2021-10-27
Supplement: s1 [file s1]

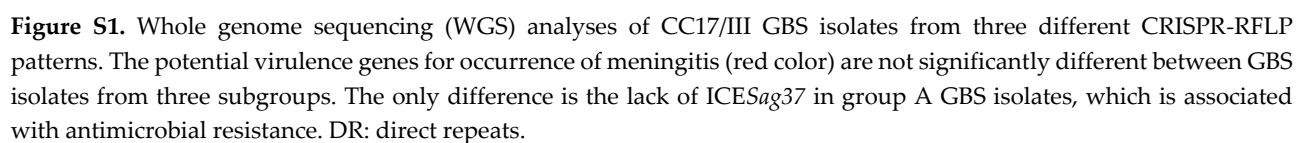

**Figure S1.** Whole genome sequencing (WGS) analyses of CC17/III GBS isolates from three different CRISPR-RFLP patterns. The potential virulence genes for occurrence of meningitis (red color) are not significantly different between GBS isolates from three subgroups. The only difference is the lack of *ICESag37* in group A GBS isolates, which is associated with antimicrobial resistance. DR: direct repeats.

**Table S1.** Correspondence between spacers and patients' conditions.

|                                                        | <i>n</i> (%)  | Gestational Age<br>(weeks) | Birth Body<br>Weight (g) | Meningitis<br><i>n</i> (%) | Complicated GBS<br>Sepsis <i>n</i> (%) | WBC Count<br>(1000/uL) | Hemoglobin Value<br>(g/dL) | C-Reactive<br>Protein (mg/L) | Leukopenia<br><i>n</i> (%) |
|--------------------------------------------------------|---------------|----------------------------|--------------------------|----------------------------|----------------------------------------|------------------------|----------------------------|------------------------------|----------------------------|
| spacer 56                                              | 101<br>(98.1) | 38 ± 3                     | 2950 ± 621               | 29 (28.7)                  | 33 (32.7)                              | 11,276 ± 7579          | 11.6 ± 2.4                 | 71.2 ± 84.5                  | 28 (27.7)                  |
| spacer 55                                              | 97<br>(94.3)  | 38 ± 3                     | 2965 ± 595               | 27 (27.8)                  | 31 (32.0)                              | 11,203 ± 7324          | 11.6 ± 2.4                 | 68.6 ± 83.9                  | 27 (27.8)                  |
| spacer 54                                              | 96<br>(93.2)  | 38 ± 3                     | 2974 ± 592               | 27 (28.1)                  | 31 (32.3)                              | 11,102 ± 7295          | 11.6 ± 2.4                 | 69.2 ± 84.1                  | 27 (28.1)                  |
| spacer 53                                              | 95<br>(92.2)  | 38 ± 3                     | 2968 ± 591               | 27 (28.4)                  | 31 (32.6)                              | 11,163 ± 7309          | 11.6 ± 2.4                 | 69.8 ± 84.3                  | 27 (28.4)                  |
| spacer 49                                              | 93<br>(90.3)  | 38 ± 3                     | 2942 ± 591               | 26 (28.0)                  | 30 (32.3)                              | 11,204 ± 7444          | 11.6 ± 2.4                 | 69.5 ± 84.3                  | 27 (29.0)                  |
| spacer 254                                             | 46<br>(44.7)  | 38 ± 3                     | 3004 ± 683               | 12 (26.1)                  | 13 (28.3)                              | 12,067 ± 7337          | 11.7 ± 2.4                 | 64.8 ± 81.4                  | 7 (15.2)                   |
| spacer 243                                             | 34<br>(33.0)  | 38 ± 3                     | 2880 ± 635               | 6 (17.6)                   | 9 (26.5)                               | 10,347 ± 7022          | 11.4 ± 1.9                 | 62.1 ± 71.5                  | 13 (38.2)                  |
| spacer S12                                             | 6 (5.8)       | 37 ± 2                     | 2643 ± 500               | 4 (66.7)                   | 4 (66.7)                               | 4950 ± 3139            | 10.4 ± 1.5                 | 111.7 ± 62.4                 | 4 (66.7)                   |
| spacer S11                                             | 5 (4.9)       | 38 ± 1                     | 2976 ± 370               | 4 (80.0)                   | 4 (80.0)                               | 5340 ± 3343            | 10.9 ± 1.2                 | 91.8 ± 43.9                  | 3 (60.0)                   |
| spacer S13, S14,<br>S15                                | 5 (4.9)       | 37 ± 2                     | 2656 ± 557               | 4 (80.0)                   | 4 (80.0)                               | 5320 ± 3360            | 10.1 ± 1.5                 | 131.3 ± 44.5                 | 3 (60.0)                   |
| spacer S18                                             | 3 (2.9)       | 38 ± 1                     | 2893 ± 474               | -                          | -                                      | 14,033 ± 1185          | 13.0 ± 0.9                 | 100.2 ± 95.6                 | -                          |
| spacer S6                                              | 2 (1.9)       | 40 ± 3                     | 3003 ± 491               | 1 (50.0)                   | 1 (50.0)                               | 14,950 ± 71            | 14.2 ± 0.4                 | 36.0 ± 25.2                  | -                          |
| spacer S17                                             | 2 (1.9)       | 35 ± 0                     | 2310 ± 184               | 2 (100)                    | 2 (100)                                | 650 ± 71               | 10.3 ± 4.8                 | 70.8 ± 47.1                  | 2 (100)                    |
| spacer S1, S10                                         | 1 (1.0)       | 33                         | 1880                     | -                          | -                                      | 3000                   | 8.1                        | 210.8                        | 1 (100)                    |
| spacer 277                                             | 1 (1.0)       | 42                         | 2655                     | -                          | -                                      | 15,000                 | 14.5                       | 53.9                         | -                          |
| spacer 82, 83, 84,<br>85, 87, 119, 120,<br>449, S2, S3 | 1 (1.0)       | 38                         | 2920                     | -                          | 1 (100)                                | 14,100                 | 15.2                       | 101.19                       | -                          |
| spacer 102                                             | 81<br>(78.6)  | 38 ± 3                     | 2949 ± 634               | 20 (24.7)                  | 24 (29.6)                              | 10,653 ± 6632          | 11.5 ± 2.1                 | 62.5 ± 75.5                  | 23 (28.4)                  |
| spacer 101                                             | 81<br>(78.6)  | 38 ± 3                     | 2942 ± 642               | 19 (23.5)                  | 23 (28.4)                              | 10,578 ± 6832          | 11.5 ± 2.1                 | 63.4 ± 76.3                  | 24 (29.6)                  |
| spacer 984                                             | 46<br>(44.7)  | 38 ± 3                     | 3004 ± 690               | 12 (26.1)                  | 13 (28.3)                              | 12,067 ± 7337          | 11.7 ± 2.4                 | 64.8 ± 81.4                  | 7 (15.2)                   |
| spacer 171                                             | 31<br>(30.1)  | 38 ± 4                     | 2900 ± 757               | 8 (25.8)                   | 9 (29.0)                               | 13,977 ± 7386          | 11.9 ± 2.4                 | 52.9 ± 64.1                  | 1 (3.2)                    |
| spacer S7                                              | 1 (1.0)       | 40                         | 2900                     | -                          | -                                      | 20,600                 | 11.1                       | 6.8                          | 1 (100)                    |
| spacer 7, 86, 476,<br>S4                               | 1 (1.0)       | 38                         | 2920                     | -                          | 1 (100)                                | 14,100                 | 15.2                       | 101.2                        | -                          |
| spacer 724                                             | 3 (2.9)       | 37 ± 2                     | 2847 ± 46                | 2 (66.7)                   | 2 (66.7)                               | 11,000 ± 8314          | 10.9 ± 0.2                 | 234.6 ± 197.3                | 1 (33.3)                   |

|            |         |        |            |         |         |               |            |           |         |
|------------|---------|--------|------------|---------|---------|---------------|------------|-----------|---------|
| spacer S9  | 2 (1.9) | 39 ± 2 | 3113 ± 350 | -       | -       | 12,350 ± 1485 | 12.2 ± 2.9 | 3.0 ± 1.4 | -       |
| spacer 398 | 1 (1.0) | 38     | 2920       | -       | 1 (100) | 14,100        | 15.2       | 101.19    | -       |
| spacer S5  | 1 (1.0) | 37     | 2500       | 1 (100) | 1 (100) | 28,00         | 9.6        | 112.8     | 1 (100) |
| spacer S8  | 1 (1.0) | 40     | 2900       | -       | -       | 20,600        | 111.1      | 6.8       | -       |
| spacer S19 | 1 (1.0) | 38     | 3480       | -       | -       | 16,000        | 12.6       | 0.6       | -       |
